# Supplementary material for: Population structure and genetic diversity of Tamarix chinensis as revealed with microsatellite markers in two estuarine flats
Source: PeerJ. 2023 Sep 11;11:e15882. doi: 10.7717/peerj.15882 (PMC10501381; doi:10.7717/peerj.15882)
Supplement: Supplemental Information 11 [file peerj-11-15882-s011.xlsx]

## Sheet: Sheet1
8	206	9	23	24	20	24	24	22	22	19	28
sample	pop.	f1		f2		f3		f3.5		f4		f5		f7		f8
1	r	204	210	247	267	-9	-9	175	175	177	177	185	199	205	217	202	202
2	r	213	219	247	247	266	266	178	178	180	180	-9	-9	201	213	216	216
3	r	210	219	247	255	272	272	163	163	165	183	185	185	201	201	212	212
4	r	204	213	255	255	266	266	163	163	156	156	175	185	-9	-9	206	210
5	r	-9	-9	251	255	272	272	163	175	168	215	-9	-9	197	201	204	220
6	r	210	216	247	247	266	266	163	163	165	177	183	183	201	217	202	202
7	r	213	216	-9	-9	266	272	163	175	177	177	173	183	193	217	202	210
8	r	207	207	247	255	266	266	175	175	180	180	183	183	205	221	212	216
9	r	207	216	247	255	266	266	163	163	155	180	185	185	205	205	206	210
10	r	198	204	247	247	-9	-9	163	163	168	180	185	187	205	209	214	214
11	r	204	204	247	251	266	272	178	178	168	177	185	199	197	197	208	220
12	r	204	207	255	255	-9	-9	175	175	-9	-9	185	189	197	201	-9	-9
13	r	204	219	255	267	254	260	175	175	165	165	185	185	-9	-9	-9	-9
14	r	210	213	255	255	266	272	163	175	156	165	175	185	201	205	202	206
15	r	198	219	255	267	266	266	175	175	174	174	183	183	201	213	216	216
16	r	210	213	247	267	266	272	163	175	165	171	175	203	201	205	202	208
17	r	207	213	255	267	266	272	163	175	156	156	185	199	205	209	206	210
18	r	210	213	255	255	266	272	163	175	165	177	187	203	209	221	214	214
19	r	198	213	243	255	266	272	163	175	165	180	183	197	-9	-9	202	214
20	r	210	210	255	255	266	266	175	175	-9	-9	185	203	-9	-9	-9	-9
21	r	210	210	255	255	266	272	178	178	168	180	199	201	189	205	214	220
22	r	213	216	247	247	266	266	175	175	180	186	185	185	189	201	210	214
23	r	213	216	247	255	266	272	175	175	165	165	173	183	197	197	202	216
24	q	198	198	235	255	266	272	163	163	156	168	183	197	201	205	204	214
25	q	204	204	255	255	-9	-9	175	175	165	174	185	203	197	217	202	204
26	q	204	210	255	255	266	272	163	175	165	168	187	201	197	201	202	202
27	q	204	204	247	247	266	266	172	175	174	189	185	201	205	229	206	216
28	q	204	219	255	255	260	272	175	178	174	177	185	203	201	201	202	210
29	q	198	210	247	255	266	266	163	172	168	177	201	203	197	201	206	212
30	q	198	210	255	255	272	272	163	178	168	177	185	201	201	205	202	216
31	q	198	204	255	255	266	272	172	175	180	195	183	185	205	213	202	212
32	q	198	213	255	255	266	272	163	172	177	192	173	201	217	217	208	214
33	q	213	213	255	255	266	272	163	178	165	168	185	201	197	209	202	202
34	q	210	210	255	255	266	266	163	175	168	171	185	187	197	201	202	202
35	q	204	219	255	255	260	272	175	178	174	177	185	203	201	201	202	210
36	q	198	198	235	255	266	272	163	163	156	168	183	197	201	205	204	214
37	q	207	210	255	255	266	272	163	163	165	168	185	203	197	217	204	206
38	q	204	204	235	255	260	266	175	175	165	174	201	203	201	201	204	214
39	q	198	213	255	255	266	266	-9	-9	168	168	185	199	201	209	202	202
40	q	210	210	251	255	266	266	167	175	168	171	173	203	201	201	204	212
41	q	198	210	247	247	266	272	175	178	174	186	183	183	201	205	204	214
42	q	204	210	235	255	266	266	163	175	168	177	183	185	213	217	206	216
43	q	204	213	235	255	266	266	175	175	156	168	173	199	201	217	202	212
44	q	204	207	247	255	272	272	163	175	165	168	185	203	-9	-9	-9	-9
45	q	198	210	255	267	272	272	167	175	165	171	175	185	197	205	204	216
46	q	210	213	247	247	266	266	163	175	165	177	173	185	197	201	202	202
47	q	204	207	235	255	266	272	163	178	165	165	199	201	189	205	204	204
52	w	198	213	267	267	260	272	175	175	165	165	185	187	201	209	202	202
53	w	198	204	247	267	260	272	163	175	165	183	185	187	201	217	206	206
54	w	204	213	255	255	266	266	175	175	165	180	173	199	201	201	202	202
55	w	204	213	255	255	266	266	163	175	168	192	183	183	201	205	206	212
56	w	204	213	255	255	266	266	163	175	168	192	183	183	201	205	206	212
57	w	198	210	247	255	266	290	163	178	189	189	183	199	201	201	210	210
58	w	204	216	-9	-9	266	266	166	175	168	195	175	183	197	217	202	202
59	w	204	210	247	247	260	266	163	175	165	165	183	187	197	201	202	206
60	w	210	213	247	247	266	266	163	175	165	186	183	187	217	217	202	214
61	w	204	210	255	255	266	272	175	175	186	192	185	187	197	217	202	202
62	w	210	213	247	247	260	266	163	163	165	177	173	187	201	201	202	210
63	w	204	219	243	255	260	266	163	172	186	189	185	197	197	225	202	214
64	w	210	213	255	255	266	266	163	175	180	180	187	199	201	217	202	202
65	w	213	216	247	255	266	266	163	175	171	177	183	203	189	217	202	206
66	w	204	210	255	267	260	272	163	175	165	192	175	201	201	217	202	202
67	w	198	204	243	267	266	272	163	175	165	183	185	187	201	217	206	206
68	w	207	216	247	255	266	266	163	175	165	174	183	185	201	201	208	214
69	w	207	210	-9	-9	260	266	163	175	165	201	185	187	197	201	204	208
70	w	-9	-9	255	255	260	266	175	175	174	180	173	185	201	201	202	206
71	w	198	213	255	255	266	266	163	175	180	180	173	187	201	217	202	202
72	d	204	213	247	267	266	272	163	172	165	174	183	187	209	209	216	220
73	d	213	216	255	255	272	266	163	175	174	177	183	199	201	201	214	214
74	d	207	219	251	267	254	272	163	175	165	174	199	203	201	205	202	214
75	d	198	213	247	267	266	266	163	181	165	168	185	197	201	205	202	202
76	d	204	210	259	267	266	272	175	175	168	180	183	195	189	201	214	214
77	d	204	213	247	255	266	266	163	175	168	180	183	187	197	217	216	216
78	d	204	204	247	255	266	272	163	163	180	186	175	201	189	205	206	214
79	d	207	210	235	255	266	272	163	175	165	168	197	197	201	217	202	202
80	d	198	207	247	267	266	272	163	175	165	195	185	203	197	205	202	210
81	d	198	213	235	247	266	272	175	178	171	171	185	203	201	201	218	218
82	d	213	213	247	255	266	266	163	175	174	177	179	187	209	217	210	214
83	d	207	213	247	255	266	272	163	175	165	192	179	185	201	205	202	214
84	d	210	210	251	259	266	272	163	175	165	174	185	185	201	205	202	214
85	d	210	219	255	235	266	266	163	175	-9	-9	185	185	205	221	218	218
86	d	204	213	247	255	266	272	163	175	168	171	179	201	217	217	204	214
87	d	210	219	247	255	266	266	175	175	165	180	-9	-9	197	207	202	214
88	d	198	204	247	255	266	272	175	175	174	180	185	185	201	201	204	204
89	d	204	210	255	255	266	266	163	175	177	192	199	199	-9	-9	214	214
90	d	-9	-9	255	255	266	272	-9	-9	165	177	-9	-9	197	197	-9	-9
91	d	207	219	235	267	260	266	163	175	165	177	173	183	197	209	202	214
92	d	207	210	255	255	260	266	163	175	165	177	183	183	197	209	206	214
93	d	207	210	247	255	260	266	163	175	-9	-9	183	203	-9	-9	206	212
94	d	204	219	-9	-9	260	266	163	175	165	157	183	199	197	221	212	214
95	d	210	210	-9	-9	260	278	175	175	-9	-9	173	183	205	217	212	218
96	xinhu	210	219	247	255	260	266	163	175	168	183	183	185	201	201	216	220
97	xinhu	219	219	247	255	260	266	163	175	180	180	175	183	197	201	202	214
98	xinhu	216	216	-9	-9	260	266	175	175	-9	-9	175	185	201	201	204	214
99	xinhu	204	204	-9	-9	266	272	175	175	174	183	185	185	197	205	214	222
100	xinhu	204	210	247	267	266	272	163	163	-9	-9	183	197	201	205	202	210
101	xinhu	210	210	-9	-9	266	272	163	175	165	174	183	207	201	217	202	218
102	xinhu	198	204	247	255	260	266	157	163	177	180	173	195	201	205	206	210
103	xinhu	204	210	255	267	254	266	175	175	177	177	153	203	205	209	214	214
106	xinhu	-9	-9	247	255	262	272	157	163	165	177	185	199	-9	-9	212	216
107	xinhu	-9	-9	243	255	259	266	169	175	165	168	183	185	201	205	212	214
108	xinhu	198	204	243	255	260	266	163	175	195	195	183	185	201	205	202	202
109	xinhu	207	213	255	247	266	280	175	175	156	165	175	185	217	217	202	206
110	xinhu	204	207	258	267	260	272	157	163	171	171	175	199	197	197	202	212
111	xinhu	210	213	243	255	260	272	157	163	165	174	173	183	197	201	206	216
114	xinhu	207	213	255	255	260	266	163	175	168	177	203	207	197	213	204	210
115	xinhu	-9	-9	247	255	272	280	175	175	180	180	183	187	201	201	204	210
116	xinhu	-9	-9	255	247	262	272	169	175	165	174	187	199	197	209	216	216
117	xinhu	-9	-9	239	247	256	268	-9	-9	168	177	183	199	197	201	202	212
118	xinhu	198	204	255	267	260	266	163	175	165	165	197	201	201	217	206	214
119	xinhu	-9	-9	235	255	260	272	175	175	171	171	175	203	189	189	202	202
120	xinhu	207	216	247	255	260	266	175	175	186	186	183	185	201	205	202	214
123	xinhu	213	213	247	255	260	266	175	175	165	165	175	185	201	209	202	216
124	xinhu	207	219	243	247	266	272	163	163	165	210	185	203	197	205	214	218
125	xinhu	-9	-9	243	247	254	266	175	175	171	186	187	201	205	221	206	214
126	hedong	204	210	255	255	260	266	175	175	172	189	185	199	201	201	214	214
127	hedong	198	207	-9	-9	260	266	175	175	165	177	185	185	201	201	202	202
128	hedong	198	204	243	267	260	272	175	175	165	165	183	201	217	217	214	214
131	hedong	210	213	255	247	260	266	175	175	165	177	183	185	-9	-9	202	214
132	hedong	204	213	243	247	266	272	175	175	171	171	183	199	201	205	202	224
133	hedong	213	219	247	255	266	266	163	178	156	174	183	185	197	201	204	214
135	hedong	204	207	247	235	260	266	163	175	156	168	185	185	205	217	212	216
136	hedong	204	207	255	255	260	266	175	175	168	186	185	187	217	217	202	214
137	hedong	204	213	247	247	272	290	163	175	174	180	183	185	-9	-9	202	216
138	hedong	-9	-9	255	255	260	266	175	175	-9	-9	183	205	197	201	214	214
139	hedong	204	207	243	243	260	272	175	175	168	177	183	185	197	205	210	220
142	hedong	204	213	243	255	254	266	163	175	168	183	175	195	201	201	196	208
143	hedong	198	213	235	267	266	272	163	175	165	165	197	205	205	209	204	216
145	hedong	198	210	243	255	260	266	175	178	156	186	183	185	201	201	202	216
146	hedong	204	210	247	255	260	266	163	178	156	189	175	197	201	201	206	212
147	hedong	198	210	243	247	266	272	163	163	168	177	199	199	197	201	212	212
148	hedong	204	207	263	267	260	266	175	175	165	176	183	201	209	209	204	214
149	hedong	213	219	251	255	260	266	163	175	165	177	183	185	197	201	202	212
150	hedong	210	219	247	267	254	266	175	175	165	203	173	185	201	221	202	202
151	hedong	204	213	247	255	258	266	163	163	168	168	185	203	201	201	202	212
152	hedong	204	204	267	255	266	272	163	163	168	180	185	205	-9	-9	206	216
155	hedong	210	210	-9	-9	266	266	163	175	165	168	183	197	197	201	214	218
156	huangj	204	210	247	255	266	272	175	175	165	168	187	203	201	201	214	214
157	huangj	198	210	247	267	260	266	163	175	195	195	175	187	201	201	202	214
158	huangj	198	204	-9	-9	254	266	163	175	165	195	-9	-9	201	205	202	212
159	huangj	201	201	-9	-9	272	272	175	178	171	171	-9	-9	189	209	214	214
161	huangj	204	213	247	251	266	272	175	175	171	195	185	199	197	209	202	214
162	huangj	198	213	247	247	260	272	163	175	165	171	173	187	197	201	214	214
163	huangj	198	213	255	267	260	272	163	175	165	171	173	187	197	201	214	214
164	huangj	198	207	251	255	257	266	175	175	168	168	187	199	201	209	202	216
165	huangj	198	216	245	255	264	270	157	163	165	180	167	195	201	209	214	214
166	huangj	198	213	247	267	266	272	169	175	165	171	173	173	201	201	204	214
167	huangj	198	209	247	267	258	266	163	175	195	195	175	187	201	201	202	214
168	huangj	198	213	255	267	260	272	163	175	165	171	173	187	197	201	214	214
169	huangj	201	213	243	247	266	272	175	175	171	171	185	201	201	209	202	214
170	huangj	198	213	-9	-9	254	266	157	169	165	171	173	187	197	201	214	214
171	huangj	198	213	247	251	260	266	175	175	171	180	189	199	201	209	214	214
172	huangj	198	209	247	267	260	266	163	175	192	195	175	187	201	201	202	214
173	huangj	198	209	247	267	260	266	163	175	195	195	175	187	201	201	202	214
174	huangj	204	216	243	247	260	272	175	175	168	174	185	201	201	209	202	214
175	huangj	198	204	247	255	254	266	163	175	168	171	199	199	197	201	202	214
176	huangj	204	204	247	255	263	272	157	163	165	168	187	199	197	209	202	212
177	huangj	201	209	247	255	254	266	163	175	165	195	199	197	201	205	202	212
178	huangj	204	213	247	255	257	266	163	163	195	195	187	199	209	209	212	212
186	linshan	198	198	247	247	266	272	163	163	165	165	173	199	197	197	202	214
187	linshan	198	210	247	247	266	266	163	163	-9	-9	183	187	205	209	210	210
188	linshan	207	210	255	271	254	272	163	163	168	168	185	187	197	197	214	214
189	linshan	207	210	266	266	266	272	163	163	-9	-9	187	201	197	209	214	214
190	linshan	-9	-9	239	239	263	263	175	175	168	186	165	165	201	209	214	214
192	linshan	207	213	255	255	266	278	-9	-9	178	178	173	187	201	201	210	214
193	linshan	-9	-9	239	239	266	266	157	157	-9	-9	167	167	201	209	214	214
194	linshan	-9	-9	239	239	254	266	163	175	165	178	179	185	201	209	202	210
196	linshan	198	219	243	251	266	272	163	172	156	165	166	192	201	209	-9	-9
197	linshan	207	207	247	255	266	272	175	175	165	165	166	180	201	209	202	214
199	linshan	207	210	247	247	-9	-9	157	175	165	186	180	192	197	209	214	214
200	linshan	-9	-9	247	251	266	272	157	157	156	165	178	192	197	209	202	210
201	linshan	-9	-9	255	255	266	272	157	169	165	165	166	190	-9	-9	202	214
202	linshan	189	219	239	239	260	266	157	157	156	165	178	192	197	209	202	210
203	linshan	210	210	-9	-9	266	272	157	169	168	186	166	192	209	209	214	216
204	linshan	207	207	-9	-9	266	272	157	157	165	168	180	192	197	209	214	214
205	linshan	204	219	247	255	266	272	157	163	189	189	192	192	197	197	202	214
206	linshan	204	213	247	247	266	272	163	175	-9	-9	178	184	201	209	204	212
207	linshan	189	213	239	239	260	266	175	175	-9	-9	176	192	193	201	204	212
210	cixi	204	210	239	247	260	266	169	169	174	186	192	198	193	201	202	210
211	cixi	204	204	239	247	260	266	163	163	165	167	178	192	201	209	202	214
212	cixi	198	210	239	239	266	266	175	175	165	177	-9	-9	-9	-9	212	212
213	cixi	-9	-9	247	255	266	266	175	175	165	171	178	192	-9	-9	202	218
214	cixi	210	210	239	247	266	272	175	175	174	186	-9	-9	193	201	202	210
215	cixi	210	213	247	247	251	257	-9	-9	168	174	166	178	197	205	202	214
216	cixi	198	210	239	247	260	266	163	175	165	168	-9	-9	197	209	212	216
217	cixi	-9	-9	239	259	260	266	157	157	168	168	166	192	197	205	202	202
218	cixi	198	210	239	247	260	266	169	175	165	165	176	176	189	201	214	216
219	cixi	198	210	239	247	260	266	169	169	-9	-9	176	176	185	197	212	214
220	cixi	198	210	239	247	260	266	163	172	156	165	176	192	201	209	-9	-9
221	cixi	210	213	239	259	266	272	163	175	174	180	180	192	194	201	202	202
222	cixi	198	204	239	259	260	266	157	157	168	168	176	178	201	209	202	214
223	cixi	198	210	239	247	260	272	175	175	165	165	176	176	189	201	214	214
224	cixi	198	210	239	239	257	266	175	175	156	174	194	194	209	201	212	214
225	cixi	-9	-9	247	247	257	266	163	163	156	165	176	182	193	201	-9	-9
226	cixi	198	210	239	239	257	257	169	169	165	177	196	196	193	209	-9	-9
227	cixi	198	210	239	239	263	263	169	169	-9	-9	166	196	201	209	214	214
228	cixi	210	213	239	239	248	266	175	175	-9	-9	166	192	189	201	214	214
229	cixi	210	213	247	247	260	260	163	175	168	174	-9	-9	197	205	202	214
230	cixi	198	198	247	247	260	266	157	163	-9	-9	180	192	-9	-9	210	210
231	cixi	198	210	239	239	260	260	169	169	171	171	166	196	197	204	214	214
232	cixi	198	210	239	239	254	266	169	169	174	182	184	186	189	204	-9	-9
233	cixi	198	198	239	239	260	266	163	175	165	165	172	202	197	209	212	214
234	cixi	-9	-9	239	239	-9	-9	169	169	165	182	172	198	197	201	202	214
235	cixi	210	210	255	255	260	266	163	175	165	171	182	186	201	189	202	212
236	cixi	198	210	239	255	254	260	175	175	168	174	186	188	189	209	212	212
237	cixi	-9	-9	247	255	266	266	175	175	165	174	188	200	197	201	210	210
